# Supplementary material
Source: publisher figshare collection journal article supplement (https://scielo.figshare.com/articles/dataset/_/6152162)
Supplement: Supplementary file 1 [file Table_1.xls]

## Sheet: Table_1
<b>Table</b>	<b>Type</b>	<b>Field prefix</b>	<b>Role</b>
PARAMETERS	E	None	General parameters: number of periods...
LOCATIONS	E	L	Geographic sites of the chain: farms, storages, refinery...
CROPS	E	C	Crops cultivated: colza (rape), camelina, miscanthus...
CROP PARTS	E	CP	Crop parts used per crop: seeds, straw & chaff for rape...
PRODUCTS	E	P	Crop parts with a conditioning: rape straw bales...
STATES	E	S	States: crop field, swath, shed, silo, platform...
TASKS	E	T	Tasks: harvesting, baling, transport ...
ST ARCS	R	ST	State-task arcs
TS ARCS	R	TS	Task-state arcs
DEMANDS	R	D	Refinery demands per crop part and per period
RESOURCES	E	R	Equipment, e.g., combine harvester 200 hp width 5m...
FAMILIES	E	F	Resource families: harvesters, tractors, trucks, trailers ...
COMBINATIONS	E	RC	Resource combinations: tractor 200 hp + rake 5m...
GROUPS	E	CG	Resource combination groups: tractor + trailer...
LOCA FAM	R	LF	Maximum number of resources per site and family
