# Supplementary material
Source: publisher figshare collection journal article supplement (https://scielo.figshare.com/articles/dataset/_/6152162)
Supplement: Supplementary file 2 [file Table_2.xls]

## Sheet: Table_2
<b><em>PerDur</em></b>	<b>Duration of one period in days, e.g., 1 or 7</b>
<em>NPer</em>	Number of periods of the planning horizon, e.g., 365 for one year if <em>PerDur</em> = 1
<em>Ref Per</em>	Duration of one refinery-period in periods, e.g., 7 if demands given per week
<em>NA</em>	Character string used to initialize empty fields (“not available”)
<em>Huge</em>	Large positive constant to initialize some fields to infinity
<em>KgCO</em> <sub>2</sub>	Kg of CO<sub>2</sub> per liter of gasoil, to compute CO<sub>2</sub> emissions
