# Supplementary material
Source: publisher figshare collection journal article supplement (https://scielo.figshare.com/articles/dataset/_/6152162)
Supplement: Supplementary file 3 [file Table_3.xls]

## Sheet: Table_3
<b><em>H</em></b>	<b>Set of periods of planning horizon <em>H</em> = {1, 2, ..., <em>NPer</em>}</b>
<em>HR</em>	Set of refinery-periods for the demands of the refinery <em>HR</em> = {1, 2, ..., <em>NPer</em>/<em>RefPer</em>}
<em>LID</em>	Set of location (geographical sites) identifiers L1, L2, ... (key-set of worksheet LOCATIONS)
<em>CI D</em>	Set of crop identifiers C1, C2, ... (key-set of worksheet CROPS)
<em>CP I D</em>	Set of crop part identifiers CP1, CP2, ... (key-set of worksheet CROP PARTS)
<em>PI D</em>	Set of product identifiers P1, P2, ... (key-set of worksheet PRODUCTS)
<em>SID</em>	Set of state identifiers S1, S2, ... (keys-set of worksheet STATES)
<em>TID</em>	Set of task identifiers T1, T2, ... (key-set of worksheet TASKS)
<em>RID</em>	Set of resource identifiers R1, R2, ... (key-set of worksheet RESOURCES)
<em>RFI D</em>	Set of resource family identifiers RF1, RF2, ... (key-set of worksheet FAMILIES)
<em>RCID</em>	Set of resource combination identifiers RC1, RC2, ... (key-set of COMBINATIONS)
<em>CGID</em>	Set of combination group identifiers (key-set of worksheet GROUPS)
<em>TS A</em>	Set of task-state arcs (<em>i</em>, <em>e</em>), <em>TSA</em> &#8838; <em>TID</em> &#215; <em>SID</em> (key-set of worksheet TS ARCS)
<em>STA</em>	Set of state-task arcs (<em>e</em>, <em>i</em>), <em>ST A</em> &#8838; <em>SID</em> &#215; <em>TID</em> (key-set of worksheet ST ARCS)
<em>DPairs</em>	Set of pairs (refinery period, product) ⊆ <em>HR</em> &#215; <em>CPI D</em> (key-set of worksheet DEMANDS)
<em>LFPairs</em>	Set of pairs (location, resource family) ⊆ <em>LID</em> &#215; <em>RFI D</em> (key-set of worksheet LOCA FAM)
<em>RCRPairs</em>	Set of pairs (resource combination, resource) ⊆ <em>RCID</em> &#215; <em>RID</em>
<em>Z</em>	Set of current task types {<em>Harvest</em>, <em>Dry</em>, <em>Rake</em>, <em>Bale</em>, <em>Pretreat</em>, <em>Transport</em>, <em>Ref ine</em>}
<em>ZHR</em>	Subset {<em>Harvest</em>, <em>Rake</em>} of <em>Z</em>
<em>ZHRB</em>	Subset {<em>Harvest</em>, <em>Rake</em>, <em>Bale</em>} of <em>Z</em>
