# Supplementary material
Source: publisher figshare collection journal article supplement (https://scielo.figshare.com/articles/dataset/_/6152162)
Supplement: Supplementary file 4 [file Table_4.xls]

## Sheet: Table_4
<b>For each location <em>l</em> &#8712; <em>LID</em> read from worksheet LOCATIONS</b>
<em>LType</em> <sub> <em>l</em> </sub>	Type of site, current allowed values in {<em>Farm, Storage, Pretreatment, Refinery</em>}
<em>LHours</em> <sub> <em>l</em> </sub>	Number of working hours per period
<strong>For each product <em>p</em> &#8712; <em>PID</em> read from worksheet PRODUCTS</strong>
<em>PPart</em> <sub> <em>p</em> </sub>	ID of crop part used (also used to retrieve the crop)
<em>P Dens</em> <sub> <em>p</em> </sub>	Density in metric tons per cubic meter
<em>P Dry</em> <sub> <em>p</em> </sub>	Fraction of dry matter, e.g., 0.9 for 10% humidity
<strong>For each state <em>e</em> &#8712; <em>SID</em> read from table worksheet STATES</strong>
<em>SType</em> <sub> <em>e</em> </sub>	Type of state, current possible values in {<em>Field, WIP</em> (work in progress), <em>Stock</em>}
<em>SLoca</em> <sub> <em>e</em> </sub>	ID of the site where the state is located
<em>SProd</em> <sub> <em>e</em> </sub>	ID of product associated with the state
<em>SBeg</em> <sub> <em>e</em> </sub>	First period of utilization window
<em>SEnd</em> <sub> <em>e</em> </sub>	Last period of utilization window
<em>SCapa</em> <sub> <em>e</em> </sub>	Storage capacity in metric tons (not used for the <em>Field</em> type)
<em>SQBeg</em> <sub> <em>e</em> </sub>	Initial inventory in metric tons (≤ <em>SCapa</em>)
<em>SQEndMin</em> <sub> <em>e</em> </sub>	Minimum required final inventory in metric tons (≤ <em>SCapa</em>)
<em>SQEndMax</em> <sub> <em>e</em> </sub>	Maximum required final inventory in metric tons (≥ <em>SQEndMin,</em> &#8804; <em>SCapa</em>)
<em>SInvCost</em> <sub> <em>e</em> </sub>	Inventory cost in euros per metric ton and per period
<em>S InpCost</em> <sub> <em>e</em> </sub>	Input cost (handling cost) in euros per metric ton and per period
<em>SOutCost</em> <sub> <em>e</em> </sub>	Output cost (handling cost) in euros per metric ton and per period
<em>SThru</em> <sub> <em>e</em> </sub>	Maximum throughput in metric tons per hour
<em>S Deg</em> <sub> <em>e</em> </sub>	Product degradation (storage loss) per period, e.g., 0.99 if 1% is lost
<em>S Rep</em> <sub> <em>e</em> </sub>	For the <em>Stock</em>state type, ID of the representative in case of shared stock (see 5.2)
<strong>For each task <em>i</em> &#8712; <em>TID</em> read from table TASKS</strong>
<em>TType</em> <sub> <em>i</em> </sub>	Type of task, allowed values in {<em>Harvest, Dry, Rake, Bale, Pretreat, Transport, Refine</em>}
<em>TLoca</em> <sub> <em>i</em> </sub>	ID of geographical site (for transport tasks, this is the depot of vehicles)
<em>T Dist</em> <sub> <em>i</em> </sub>	Precomputed road distance (transport tasks only)
<em>T Group</em> <sub> <em>i</em> </sub>	ID of resource combination group required to execute the task
<strong>For each state-task arc (<em>e, i</em>) &#8712; <em>STA</em> read from worksheet ST ARCS</strong>
<em>STFrac</em> <sub> <em>e, i</em> </sub>	Ratio between the flow on the arc and the total flow consumed by the task
<em>STYield</em> <sub> <em>e, i</em> </sub>	Yield in metric tons per hectare (used only for the outgoing arcs of <em>Field</em> states)
<strong>For each task-state arc (<em>i, e</em>) &#8712; <em>TSA</em> read from worksheet TS ARCS</strong>
<em>TSFrac</em> <sub> <em>i, e</em> </sub>	Ratio between the flow on the arc and the total flow consumed by the task
<em>TSDura</em> <sub> <em>i, e</em> </sub>	Processing time in periods for the output to state <em>e</em>
<strong>For each resource <em>r</em> &#8712; <em>RID</em> read from worksheet RESOURCES</strong>
<em>RFam</em> <sub> <em>r</em> </sub>	ID of resource family to which the resource belongs
<em>RCCost</em> <sub> <em>r</em> </sub>	Fixed cost (capital cost) in euros over the planning horizon
<em>RWT ime</em> <sub> <em>r</em> </sub>	Maximum working time per period, in hours
<strong>For each resource combination <em>c</em> &#8712; <em>RCI D</em> read from worksheet COMBINATIONS</strong>
<em>RCGroup</em> <sub> <em>c</em> </sub>	ID of combination group to which combination <em>c</em> belongs
<em>RCOCost</em> <sub> <em>c</em> </sub>	Operating cost in euros per hour
<em>RCThru</em> <sub> <em>c</em> </sub>	Productivity in ha/h if <em>c</em> treats a <em>Harvest</em>or <em>Rake</em> task, in bales/h if <em>c</em> treats a <em>Bale</em> task
<em>RCSpeed</em> <sub> <em>c</em> </sub>	Average speed in km/h
<em>RCWeight</em> <sub> <em>c</em> </sub>	Maximum weight of payload in metric tons
<em>RCVolume</em> <sub> <em>c</em> </sub>	Maximum volume of payload in cubic meters
<em>RC Power</em>	Power in kilowatts
<em>RCFuel</em>	Gasoil consumption in liters per hour
<strong>For each pair (<em>w, k</em>) &#8712; <em>DPairs</em>read from worksheet DEMANDS</strong>
<em>DNeed</em> <sub> <em>w, k</em> </sub>	Demand for crop part <em>k</em> in refinery-period <em>w</em>, in dry metric tons
<strong>For each pair (<em>l, f</em>) &#8712; <em>LFPairs</em>read from worksheet LOCA FAM</strong>
<em>LFN Max</em> <sub> <em>l, f</em> </sub>	Maximum number of resources from family <em>f</em> that can be employed on site <em>l</em>
