# Supplementary material
Source: publisher figshare collection journal article supplement (https://scielo.figshare.com/articles/dataset/_/6152162)
Supplement: Supplementary file 5 [file Table_5.xls]

## Sheet: Table_5
<b>Non-negative real variables</b>
<em>X</em> <sub> <em>e, i, t</em> </sub>	Product flow in metric tons on state-task arc (<em>e, i</em>) in period <em>t</em>
<em>Y</em> <sub> <em>i, e, t</em> </sub>	Product flow in metric tons on task-state arc (<em>i, e</em>) in period <em>t</em>
<em>S</em> <sub> <em>e, t</em> </sub>	Inventory level of state <em>e</em> at the end of period <em>t</em> in metric tons
<em>Amp</em> <sub> <em>i, c, t</em> </sub>	Total amount processed by task <em>i</em> with resource combination <em>c</em> in period <em>t</em>, in metric tons
<em>TCH RB</em> <sub> <em>i, c, t</em> </sub>	Total working time of resource combination <em>c</em> in period <em>t</em> for a task <em>i</em> &#8712; <em>ZHRB</em>, in hours
<em>TCT</em> <sub> <em>i, c, t</em> </sub>	Total working time of resource combination <em>c</em> in period <em>t</em> for a transport task <em>i</em>, in hours
<em>T R</em> <sub> <em>l, r, t</em> </sub>	Total working time of resource <em>r</em> on site <em>l</em> in period <em>t</em>, in hours
<strong>Integer variables</strong>
<em>RT</em> <sub> <em>i, c, t</em> </sub>	Number of rotations done by combination <em>c</em> for a transport task <em>i</em> in period <em>t</em>
<em>F S</em> <sub> <em>l, r</em> </sub>	Number of units of resource <em>r</em> (fleet size) required on site <em>l</em>
