# Supplementary material
Source: publisher figshare collection journal article supplement (https://scielo.figshare.com/articles/dataset/_/6152162)
Supplement: Supplementary file 6 [file Table_6.xls]

## Sheet: Table_6
<b>Location</b>	<b>Type</b>	<b>City</b>	<b>Time window</b>	<b>Harvesting chain</b>
L1	Refinery	Venette	[1, 364]	-
L2	Storage	Dammard	[1, 364]	-
L3	Storage	Bresles	[1, 364]	-
L4	Storage	Guiscard	[1, 364]	-
L5	Farm	Essuiles	[196, 271]	1
L6	Farm	Mouy	[69, 144]	2
L7	Farm	Catigny	[62, 77] and [189, 264]	3
L8	Farm	Villeselve	[62, 77] and [189, 264]	3
L9	Farm	Lassigny	[62, 77] and [189, 264]	3
L10	Farm	Ravenel	[196, 271]	1
L11	Farm	Troe¨snes	[69, 144]	2
L12	Farm	Brumetz	[76, 91] and [203, 278]	3
L13	Farm	Raray	[76, 91] and [203, 278]	3
L14	Farm	Attichy	[76, 91] and [203, 278]	3
