# Supplementary material
Source: publisher figshare collection journal article supplement (https://scielo.figshare.com/articles/dataset/_/6152162)
Supplement: Supplementary file 7 [file Table_7.xls]

## Sheet: Table_7
<b>Crop</b>	<b>Product</b>	<b>Annual demand</b>
Rape	Seeds (bulk)	17,690
	Straw (bales)	14,120
	Chaff (bales)	6,920
Miscanthus	Straw (bales)	12,000
